# Supplementary material
Source: PubMed Central journal article supplement (PMC454165)
Supplement: pnas_101_27_10066__7.pdf [file pnas_101_27_10066__7.pdf]

**Table 3. Impact of differences in cleavage rate constants between the minor and major subpopulations on the average cleavage rate constant**

| <b>Variant</b> | <b><math>\rho</math></b> | <b><math>k_{\text{cleav,I}}</math></b> | <b><math>k_{\text{cleav,II-IV}}</math></b> | <b>Res. sq.</b> | <b><math>f_1</math></b> | <b><math>k_{\text{cleav}}</math></b> |
|----------------|--------------------------|----------------------------------------|--------------------------------------------|-----------------|-------------------------|--------------------------------------|
|                | 10                       | 0.02                                   | 0.19                                       | 0.0030          | 0.62                    | 0.09                                 |
|                | 6                        | <i>0.03</i>                            | <i>0.17</i>                                | <i>0.0026</i>   | <i>0.62</i>             | <i>0.08</i>                          |
| WT             | 3                        | 0.05                                   | 0.16                                       | 0.0028          | 0.62                    | 0.09                                 |
|                | 1                        | 0.15                                   | 0.15                                       | 0.0035          | 0.62                    | 0.15                                 |
|                | 0.33                     | 0.45                                   | 0.15                                       | 0.0039          | 0.62                    | 0.33                                 |
|                | 15                       | 0.05                                   | 0.76                                       | 0.0033          | 0.62                    | 0.32                                 |
|                | <i>10</i>                | <i>0.07</i>                            | <i>0.67</i>                                | <i>0.0025</i>   | <i>0.62</i>             | <i>0.30</i>                          |
| dC12           | 3                        | 0.19                                   | 0.57                                       | 0.0065          | 0.62                    | 0.34                                 |
|                | 1                        | 0.56                                   | 0.56                                       | 0.0102          | 0.62                    | 0.56                                 |
|                | 0.33                     | 1.72                                   | 0.57                                       | 0.0186          | 0.62                    | 1.28                                 |
|                | 10                       | 0.03                                   | 0.29                                       | 0.0150          | 0.64                    | 0.12                                 |
|                | 5                        | <i>0.04</i>                            | <i>0.19</i>                                | <i>0.0035</i>   | <i>0.64</i>             | <i>0.09</i>                          |
| dA38           | 3                        | 0.05                                   | 0.14                                       | 0.0012          | 0.64                    | 0.08                                 |
|                | 1                        | 0.08                                   | 0.08                                       | 0.0305          | 0.64                    | 0.08                                 |
|                | 0.33                     | 0.13                                   | 0.04                                       | 0.1133          | 0.64                    | 0.10                                 |
|                | 10                       | 0.01                                   | 0.12                                       | 0.0008          | 0.64                    | 0.05                                 |
|                | 8                        | <i>0.01</i>                            | <i>0.11</i>                                | <i>0.0003</i>   | <i>0.64</i>             | <i>0.05</i>                          |
| C39S3          | 3                        | 0.02                                   | 0.06                                       | 0.0149          | 0.64                    | 0.04                                 |
|                | 1                        | 0.04                                   | 0.04                                       | 0.0620          | 0.64                    | 0.04                                 |
|                | 0.33                     | 0.14                                   | 0.05                                       | 0.1153          | 0.64                    | 0.11                                 |
|                | 10                       | 0.002                                  | 0.019                                      | 0.0062          | 0.48                    | 0.011                                |
|                | 4                        | <i>0.003</i>                           | <i>0.012</i>                               | <i>0.0029</i>   | <i>0.48</i>             | <i>0.007</i>                         |
| RzAS3          | 3                        | 0.003                                  | 0.010                                      | 0.0031          | 0.48                    | 0.007                                |
|                | 1                        | 0.006                                  | 0.006                                      | 0.0103          | 0.48                    | 0.006                                |
|                | 0.33                     | 0.015                                  | 0.005                                      | 0.0248          | 0.48                    | 0.010                                |
|                | 10                       | 0.002                                  | 0.024                                      | 0.0056          | 0.53                    | 0.012                                |

| <b>Variant</b> | <b><math>\rho</math></b> | <b><math>k_{\text{cleav,I}}</math></b> | <b><math>k_{\text{cleav,II-IV}}</math></b> | <b>Res. sq.</b> | <b><math>f_1</math></b> | <b><math>k_{\text{cleav}}</math></b> |
|----------------|--------------------------|----------------------------------------|--------------------------------------------|-----------------|-------------------------|--------------------------------------|
|                | <i>6</i>                 | <i>0.003</i>                           | <i>0.017</i>                               | <i>0.0045</i>   | <i>0.53</i>             | <i>0.010</i>                         |
| RzAS3/C39S3    | 3                        | 0.004                                  | 0.011                                      | 0.0083          | 0.53                    | 0.007                                |
|                | 1                        | 0.006                                  | 0.006                                      | 0.0338          | 0.53                    | 0.006                                |
|                | 0.33                     | 0.012                                  | 0.004                                      | 0.0964          | 0.53                    | 0.008                                |

The rate of cleavage ( $k_{\text{cleav}}$ ) was derived from an analytical fit to the experimental data as described above, while keeping the ratio  $\rho = k_{\text{cleav,II-IV}}/k_{\text{cleav,I}}$  of the cleavage rate constants of the minor ( $k_{\text{cleav,II-IV}}$ ) to that of the major sub-populations ( $k_{\text{cleav,I}}$ ) constant at the tabulated value. Res. sq. indicates the sum of the squared residuals between fit and data. The average rate of cleavage was calculated as  $k_{\text{cleav,ave}} = f_1 \times k_{\text{cleav,I}} + (1 [\text{minus}] f_1) \times k_{\text{cleav,II-IV}}$ . The values for the optimal  $\rho$  (resulting in the lowest Res. sq.) are in italics.
