# Supplementary material
Source: PubMed Central journal article supplement (PMC454165)

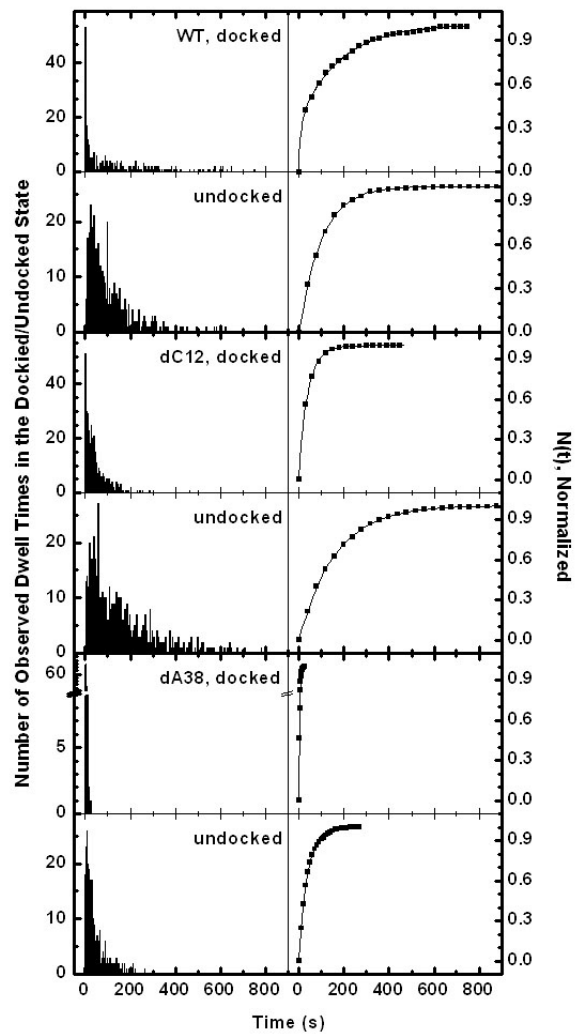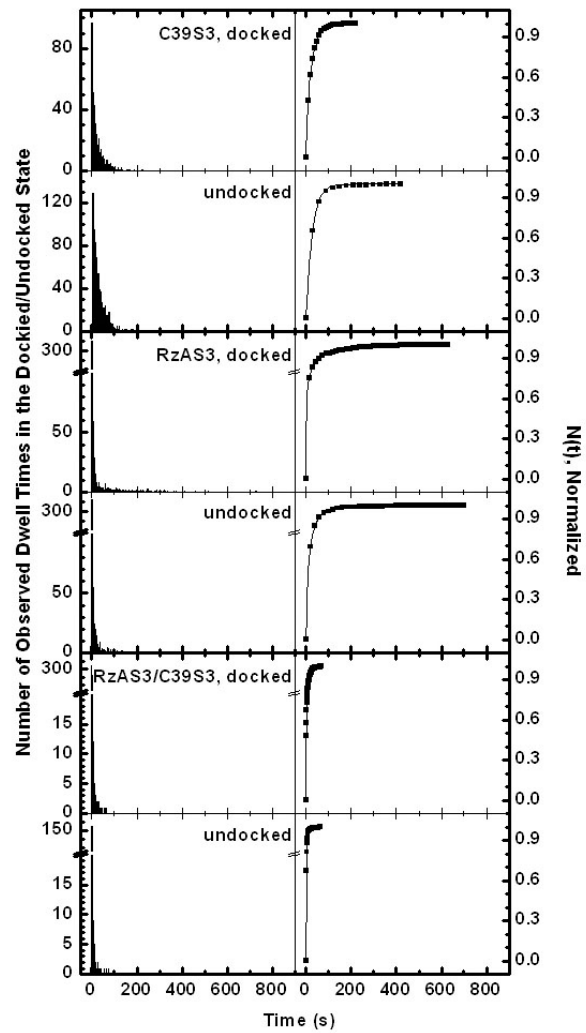

Supplement: pnas_101_27_10066__1.pdf [file pnas_101_27_10066__1.pdf]

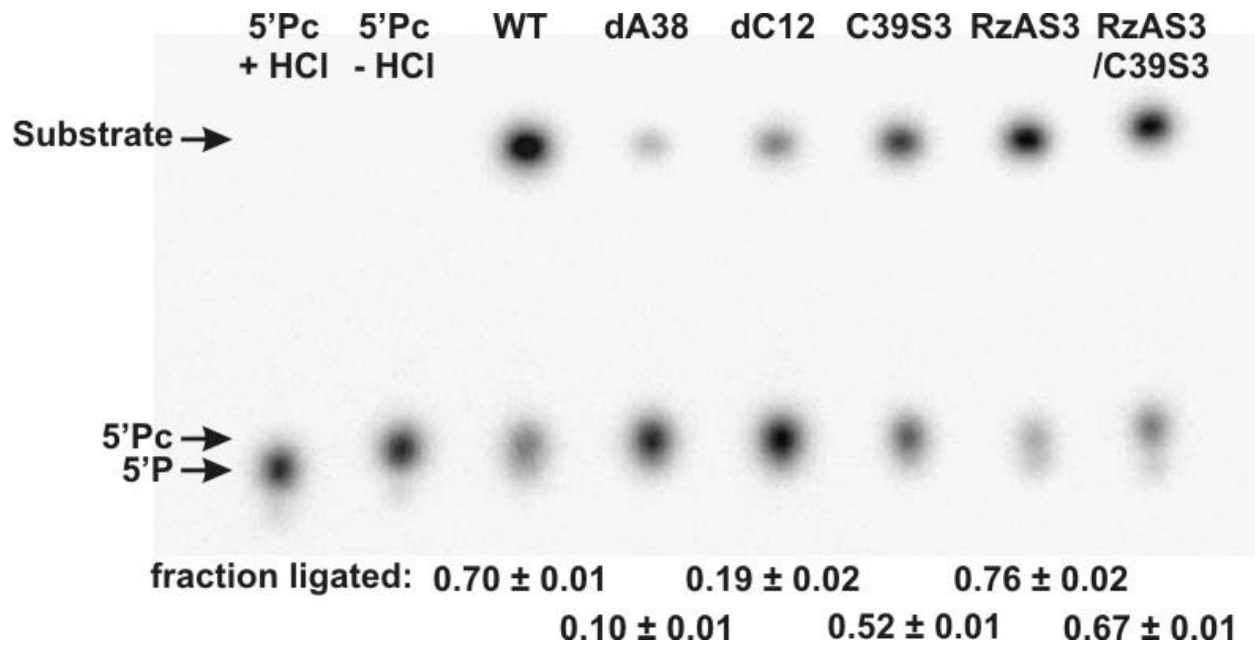

Supplement: pnas_101_27_10066__2.pdf [file pnas_101_27_10066__2.pdf]

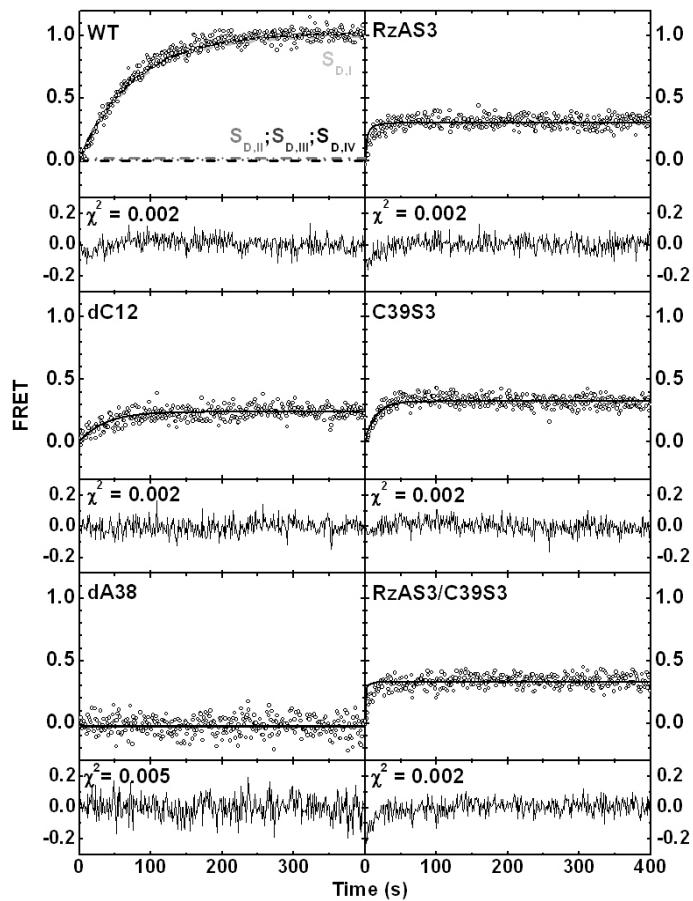

Supplement: pnas_101_27_10066__4.pdf [file pnas_101_27_10066__4.pdf]

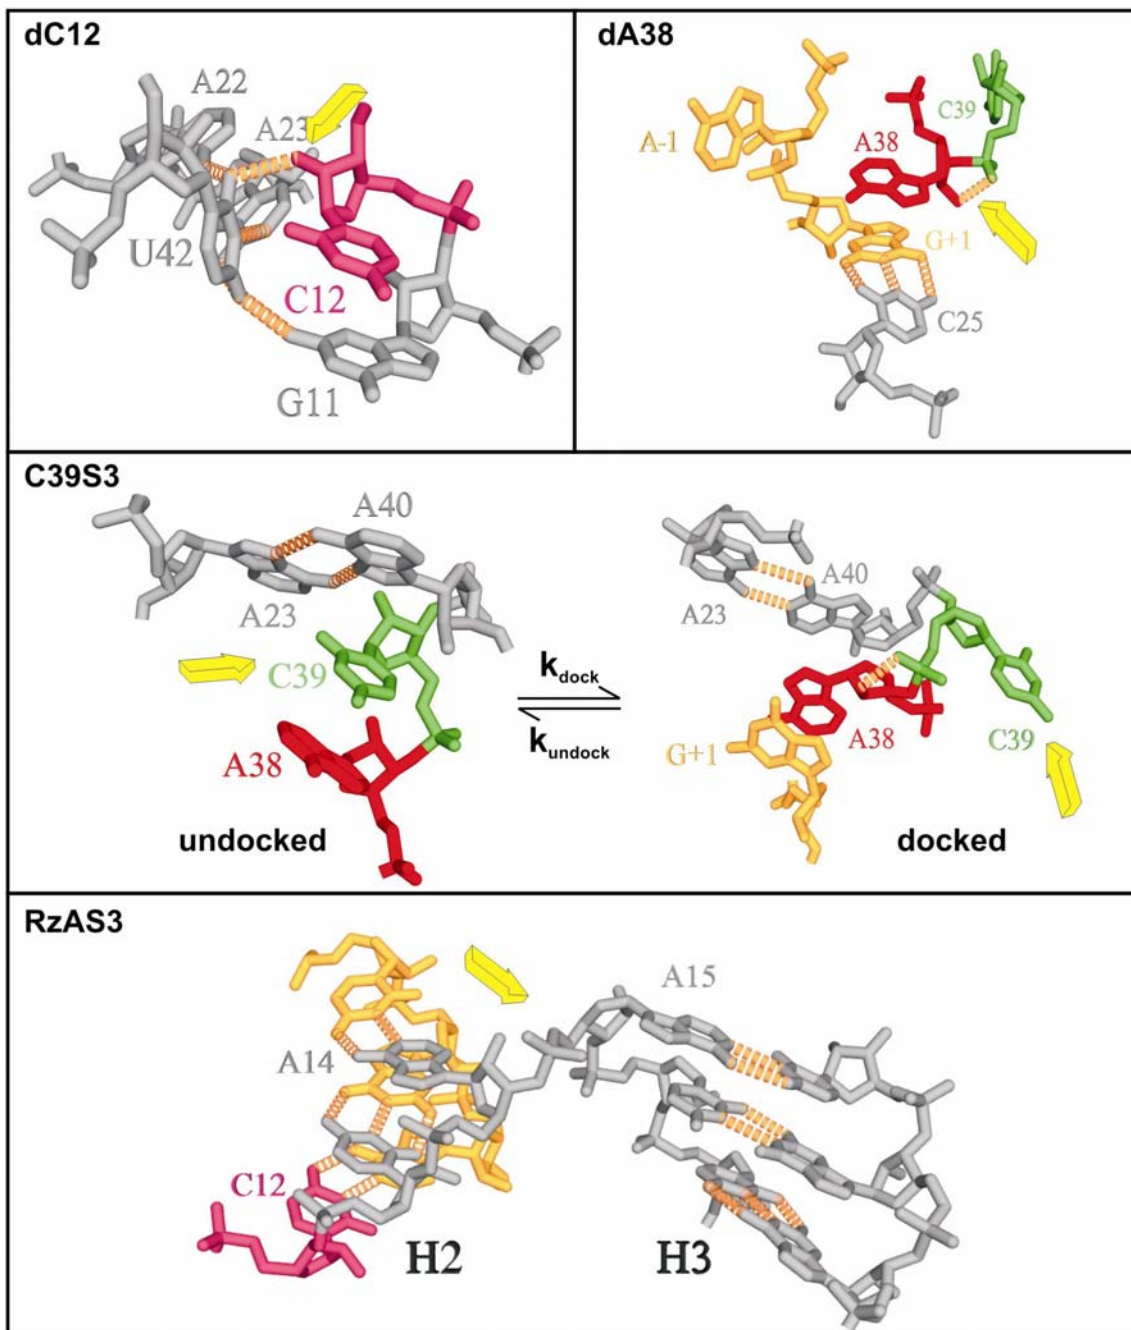

Supplement: pnas_101_27_10066__5.pdf [file pnas_101_27_10066__5.pdf]

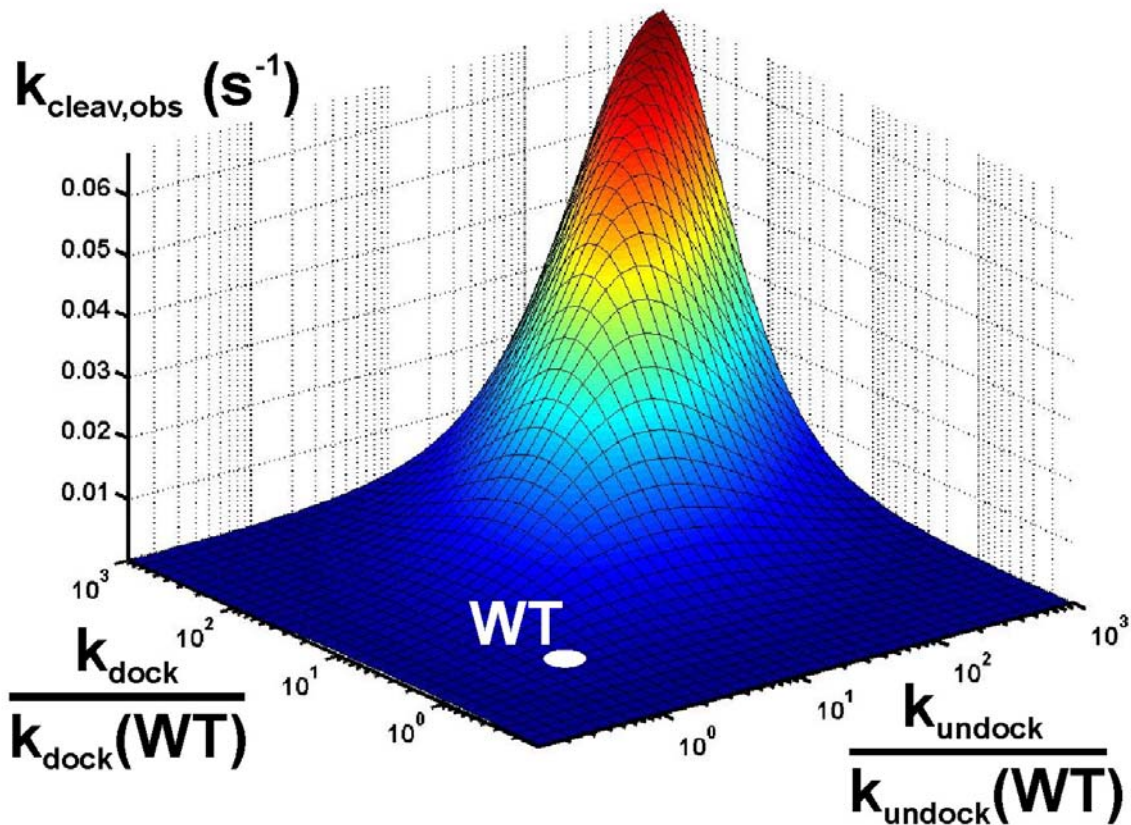

Supplement: pnas_101_27_10066__6.pdf [file pnas_101_27_10066__6.pdf]

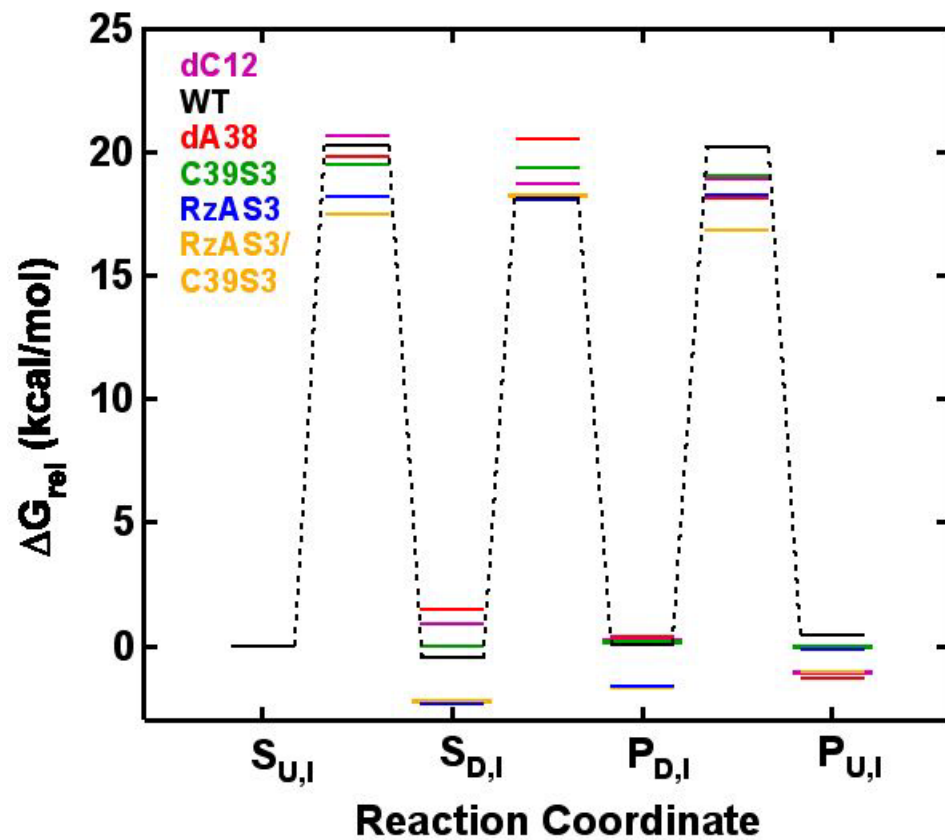

Supplement: pnas_101_27_10066__8.pdf [file pnas_101_27_10066__8.pdf]
